# Supplementary material for: Relationship Between Epicardial Fat Tissue, Endothelial Function, and Coronary Flow Reserve in Coronary Microvascular Disease Patients
Source: Research Square preprint supplement (doi:10.21203/rs.3.rs-7341737/v1), 2025-09-03
Supplement: Supplementary file 1 [file 0b4236647ba35c01b3f3e48d.docx]

| **Table3.The correlation between FMD, EFT and cardiovascular risk factors.** | | | | |
| --- | --- | --- | --- | --- |
|  | FMD | | EFT | |
|  | *r* | *P* | *r* | *P* |
| Sex | -0.133 | 0.389 | -0.074 | 0.634 |
| Age | -0.337 | 0.025 | 0.076 | 0.625 |
| BMI | 0.063 | 0.684 | 0.168 | 0.275 |
| Hypertension | -0.118 | 0.447 | 0.087 | 0.576 |
| Diabetes | 0.028 | 0.857 | 0.197 | 0.199 |
| Smoking | -0.113 | 0.465 | 0.137 | 0.377 |
| Total cholesterol | 0.388 | 0.009 | -0.13 | 0.401 |
| Triglyceride | 0.188 | 0.221 | 0.177 | 0.25 |
