# Supplementary material for: Relationship Between Epicardial Fat Tissue, Endothelial Function, and Coronary Flow Reserve in Coronary Microvascular Disease Patients
Source: Research Square preprint supplement (doi:10.21203/rs.3.rs-7341737/v1), 2025-09-03
Supplement: Supplementary file 2 [file 882a4c30315b09b33b98d7cb.docx]

| **Table2 Multivariate binary logistic regression analysis was used to evaluate the influence factors of CMD.** | | | | | |
| --- | --- | --- | --- | --- | --- |
|  | *β* | *SE* | *P* | *OR* | 95%*CI* |
| Age | -0.006 | 0.055 | 0.919 | 0.994 | 0.892-1.109 |
| TnI | -0.297 | 0.211 | 0.159 | 1.346 | 0.890-2.037 |
| Hypertension | 2.249 | 1.087 | 0.039 | 9.482 | 1.126-79.821 |
| FMD | 0.637 | 0.334 | 0.057 | 0.529 | 0.275-1.109 |
| EFT | 1.485 | 0.591 | 0.012 | 4.416 | 1.385-14.075 |
