# Supplementary material for: Relationship Between Epicardial Fat Tissue, Endothelial Function, and Coronary Flow Reserve in Coronary Microvascular Disease Patients
Source: Research Square preprint supplement (doi:10.21203/rs.3.rs-7341737/v1), 2025-09-03
Supplement: Supplementary file 3 [file 9036d9407ff3f7202a99fd55.docx]

| **Table1. Baseline clinical characteristics.** | | | |
| --- | --- | --- | --- |
|  | CFR decreased group（n=20） | CFR normal group （n=24） | *P* |
| Age（years） | 67 (61.25,71.25） | 55 (49.25,67.00） | 0.026 |
| Male(n%) | 12 (41.4%） | 17 (45.9%） | 0.507 |
| BMI(g/m2) | 26.87±3.29 | 26.8±4.14 | 0.278 |
| TnI (pg/ml) | 7.49±9.20 | 2.14±1.85 | 0.019 |
| BNP (pg/ml) | 13.00 (10.00,53.7) | 10.05 (10.00,18.88） | 0.302 |
| Total cholesterol (mmol/L) | 4.30±0.94 | 4.43±0.85 | 0.652 |
| Triglycerides (mmol/L) | 1.67±0.66 | 2.07±1.39 | 0.467 |
| Hypertention(n%) | 16 (64%) | 9 (36%) | 0.005 |
| Diabetes (n%) | 5 (62.5%） | 3 (37.5%） | 0.284 |
| Hyperlipidemia (n%) | 4 (66.7%） | 2 (33.3%） | 0.261 |
| Smoking(n%) | 6 (33.3%） | 12 (66.7%） | 0.179 |
| FMD（%） | 4.05 (3.10,5.40) | 5.3 (4.85,7.3) | 0.011 |
| EFT (mm) | 6.063±1.732 | 5.95±1.718 | 0.003 |
| e'(cm/s) | 5.95 (4.98,7.65) | 6.95 (5.70,9.90) | 0.065 |
| E/e' | 10.77±4.55 | 10.45±4.30 | 0.729 |
| EF（%） | 68.00 (60.00,70.00) | 64.00 (60.00，70.00） | 0.884 |
| IVSd(mm) | 9.85 (9.00,10.80) | 9.65 (9.00,10.08) | 0.375 |
| LAD (mm) | 36.50 (33.00,40.00) | 34 (31.25,37.75) | 0.093 |
| LVIDd(mm) | 45.00 (43.00,47.75) | 47 (43.25,48.75) | 0.205 |
| LVPW (mm) | 9.575±0.931 | 9.354±0.773 | 0.395 |
| MV Peak A(m/s) | 0.83±0.16 | 0.76±0.15 | 0.132 |
| MV Peak E(m/s) | 0.63±0.19 | 0.70±0.16 | 0.141 |
| Note: The variables that conform to the normal distribution are expressed as (mean ± standard) deviation. The variables that do not conform to the normal distribution are expressed as quartiles [ M (P25, P75)]. The categorical variables are expressed as numbers and percentages [ n (%) ]. | | | |
|  |
|  |
